# Supplementary material for: Small-Mammal Genomics Highlights Viaducts as Potential Dispersal Conduits for Fragmented Populations
Source: MDPI journal article supplement (doi:10.3390/ani14030426), 2024-01-28
Supplement: s1 [file s1]

## Supplementary Materials

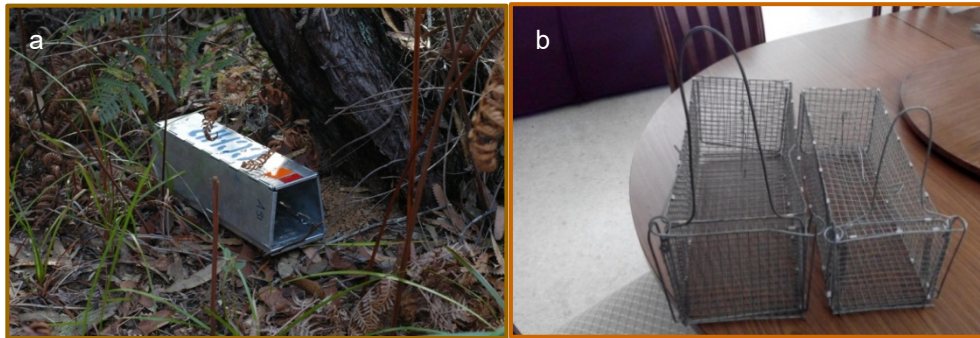

**Figure S1.** Traps used in this study: (a) Elliott sheet metal trap, (b) Tomahawk wire cage trap (photos by Tabitha Hui).

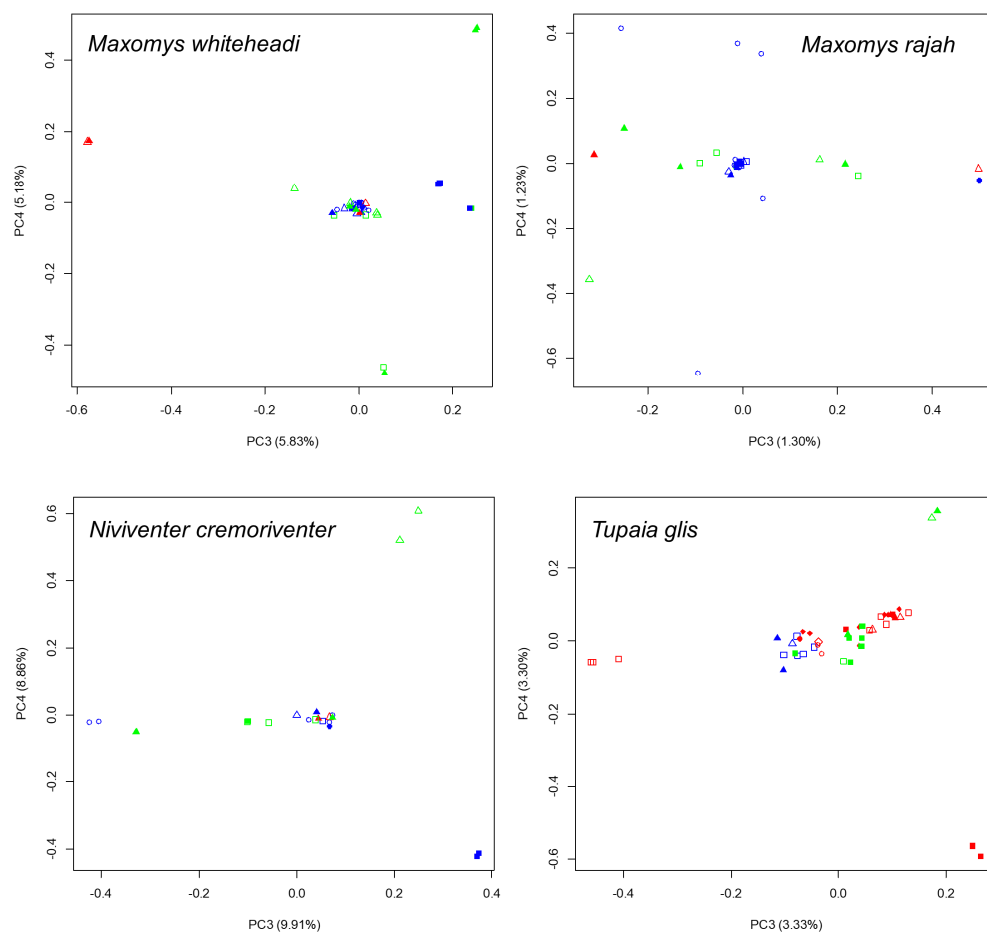

**Figure S2.** Principal component analysis (axes PC3 and PC4) of genetic differentiation among sampled individuals: (a) *Maxomys whiteheadi*, (b) *Maxomys rajah*, (c) *Niviventer cremoriventer* and (d) *Tupaia glis*. Blue: Viaduct sites, Red: Non-viaduct sites, Green: Control sites, Same shape: Same pair, Filled/Open shapes: Opposite sides of the road of the same pair.

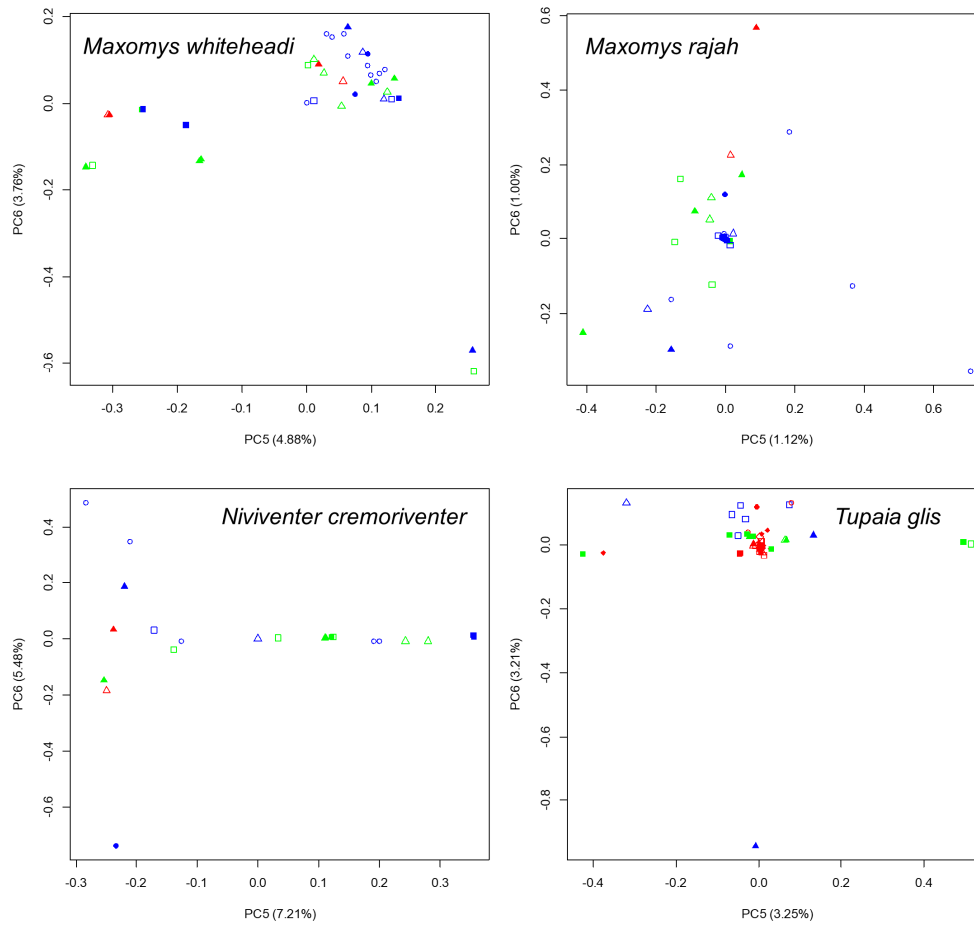

**Figure S3.** Principal component analysis (axes PC5 and PC6) of genetic differentiation among sampled individuals: (a) *Maxomys whiteheadi*, (b) *Maxomys rajah*, (c) *Niviventer cremoriventer* and (d) *Tupaia glis*. Blue: Viaduct sites, Red: Non-viaduct sites, Green: Control sites, Same shape: Same pair, Filled/Open shapes: Opposite sides of the road of the same pair.

**Table S1.** Individual species samples and sites at which they were captured.

| <i>Tupaia glis</i> |      |            | <i>Maxomys rajah</i> |      |            | <i>Maxomys whiteheadi</i> |      |            | <i>Niviventer cremoriventer</i> |      |            |
|--------------------|------|------------|----------------------|------|------------|---------------------------|------|------------|---------------------------------|------|------------|
| Sample ID          | Site | Study area | Sample ID            | Site | Study area | Sample ID                 | Site | Study area | Sample ID                       | Site | Study area |
| TG214              | NV3N | Kenyir     | MR270                | NV1S | Kenyir     | MW12                      | NV1S | Kenyir     | NC13                            | V1S  | Kenyir     |
| TG216              | NV2N | Kenyir     | MR274                | NV1S | Kenyir     | MW20                      | NV1N | Kenyir     | NC14                            | C2S  | Kenyir     |
| TG218              | NV2N | Kenyir     | MR281                | C2S  | Kenyir     | MW206                     | C3N  | Kenyir     | NC205                           | C3N  | Kenyir     |
| TG220              | NV3N | Kenyir     | MR284                | C2S  | Kenyir     | MW211                     | V2N  | Kenyir     | NC239                           | V3N  | Kenyir     |
| TG221              | NV3N | Kenyir     | MR295                | NV1N | Kenyir     | MW233                     | NV2S | Kenyir     | NC249                           | V3N  | Kenyir     |
| TG225              | C2S  | Kenyir     | MR79                 | C2S  | Kenyir     | MW236                     | NV3S | Kenyir     | NC252                           | V2N  | Kenyir     |
| TG227              | NV2S | Kenyir     | MRE38                | C2N  | Kenyir     | MW254                     | V2S  | Kenyir     | NC268                           | C3N  | Kenyir     |
| TG229              | NV3S | Kenyir     | MR107                | C4E  | Sungai Yu  | MW276                     | NV3S | Kenyir     | NC272                           | C3N  | Kenyir     |
| TG232              | C2N  | Kenyir     | MR108                | C5W  | Sungai Yu  | MW298                     | C3N  | Kenyir     | NC275                           | C3S  | Kenyir     |
| TG250              | C1S  | Kenyir     | MR109                | C5E  | Sungai Yu  | MW46                      | NV2N | Kenyir     | NC278                           | C2S  | Kenyir     |
| TG255              | C1S  | Kenyir     | MR113                | C5E  | Sungai Yu  | MW61                      | NV3S | Kenyir     | NC285                           | C2N  | Kenyir     |
| TG277              | NV3N | Kenyir     | MR119                | C5E  | Sungai Yu  | MWE27                     | C3S  | Kenyir     | NC287                           | V3N  | Kenyir     |
| TG283              | C2S  | Kenyir     | MR127                | NV4E | Sungai Yu  | MWE28                     | C3N  | Kenyir     | NC289                           | V2S  | Kenyir     |
| TG50               | NV3S | Kenyir     | MR148                | NV4E | Sungai Yu  | MWE41                     | NV3S | Kenyir     | NC291                           | V3N  | Kenyir     |
| TG51               | NV3N | Kenyir     | MR151                | NV4W | Sungai Yu  | MWE43                     | NV3S | Kenyir     | NC293                           | V3S  | Kenyir     |
| TG55               | NV3S | Kenyir     | MR152                | NV4E | Sungai Yu  | MWX2022                   | NV3N | Kenyir     | NC4                             | V1N  | Kenyir     |

|         |      |           |       |      |           |        |      |           |       |          |           |
|---------|------|-----------|-------|------|-----------|--------|------|-----------|-------|----------|-----------|
| TG56    | NV3N | Kenyir    | MR154 | V4W  | Sungai Yu | MW114  | C5W  | Sungai Yu | NC45  | V2S      | Kenyir    |
| TG59    | NV3S | Kenyir    | MR185 | C5W  | Sungai Yu | MW124  | V6E  | Sungai Yu | NC65  | C3S      | Kenyir    |
| TG71    | C2S  | Kenyir    | MR191 | NV4E | Sungai Yu | MW133  | NV5W | Sungai Yu | NC99  | V3S      | Kenyir    |
| TG72    | C2S  | Kenyir    | MR194 | V4E  | Sungai Yu | MW134  | NV6E | Sungai Yu | NCE44 | C2N      | Kenyir    |
| TG75    | C2S  | Kenyir    | MR195 | NV4W | Sungai Yu | MW136  | NV5W | Sungai Yu | NC143 | NV5<br>N | Sungai Yu |
| TG78    | C2S  | Kenyir    | MR197 | NV4E | Sungai Yu | MW137  | NV5W | Sungai Yu | NC316 | NV5E     | Sungai Yu |
| TGE37   | NV3N | Kenyir    | MR199 | NV4W | Sungai Yu | MW140  | NV5E | Sungai Yu |       |          |           |
| TGE39   | NV2S | Kenyir    | MR300 | NV4W | Sungai Yu | MW144  | NV5E | Sungai Yu |       |          |           |
| TGX2017 | C1N  | Kenyir    | MR303 | V4W  | Sungai Yu | MW146  | V4W  | Sungai Yu |       |          |           |
| TG121   | NV4W | Sungai Yu | MR305 | C4E  | Sungai Yu | MW167R | C4E  | Sungai Yu |       |          |           |
| TG126   | NV4E | Sungai Yu | MR306 | C4E  | Sungai Yu | MW168R | C4E  | Sungai Yu |       |          |           |
| TG128   | NV4E | Sungai Yu | MR322 | C5E  | Sungai Yu | MW173  | NV5E | Sungai Yu |       |          |           |
| TG135   | NV5W | Sungai Yu | MR323 | C5E  | Sungai Yu | MW177  | V6W  | Sungai Yu |       |          |           |
| TG138   | NV5W | Sungai Yu | MR324 | V4E  | Sungai Yu | MW186  | NV5W | Sungai Yu |       |          |           |
| TG139   | NV5E | Sungai Yu | MR328 | I4W  | Sungai Yu | MW189  | V4W  | Sungai Yu |       |          |           |
| TG142   | NV5W | Sungai Yu | MR339 | I5E  | Sungai Yu | MW301  | V4E  | Sungai Yu |       |          |           |
| TG157   | V4E  | Sungai Yu |       |      |           | MW304  | C4W  | Sungai Yu |       |          |           |
| TG161   | V5E  | Sungai Yu |       |      |           | MW309  | C4W  | Sungai Yu |       |          |           |
| TG163   | V5E  | Sungai Yu |       |      |           | MW333  | V6E  | Sungai Yu |       |          |           |
| TG164   | V5E  | Sungai Yu |       |      |           | MW335  | V6W  | Sungai Yu |       |          |           |
| TG166   | V5E  | Sungai Yu |       |      |           | MW336  | V6E  | Sungai Yu |       |          |           |
| TG183   | NV5W | Sungai Yu |       |      |           | MW340  | C5E  | Sungai Yu |       |          |           |
| TG184   | NV5W | Sungai Yu |       |      |           | MW342  | C5E  | Sungai Yu |       |          |           |
| TG188   | V4W  | Sungai Yu |       |      |           |        |      |           |       |          |           |
| TG317   | NV5W | Sungai Yu |       |      |           |        |      |           |       |          |           |
| TG318   | NV5W | Sungai Yu |       |      |           |        |      |           |       |          |           |
| TG326   | V4W  | Sungai Yu |       |      |           |        |      |           |       |          |           |
| TG329   | V5E  | Sungai Yu |       |      |           |        |      |           |       |          |           |
| TG338   | NV5W | Sungai Yu |       |      |           |        |      |           |       |          |           |

---

\* Last letter of site names refers to site being N-north, S-south, E-east, or W-west of the highway.

**Table S2.** Number of SNPs at each stage of filtering.

|                                 |                    |          | Number of SNPs   |        |            |        |                 |       |            |       |              |  |            |  |
|---------------------------------|--------------------|----------|------------------|--------|------------|--------|-----------------|-------|------------|-------|--------------|--|------------|--|
| Minimum allele frequency        |                    |          | No filtering     |        | <5%        |        | No filtering    |       | <5%        |       | No filtering |  | <5%        |  |
| Linkage                         |                    |          | Linkage          |        | No linkage |        | Linkage         |       | No linkage |       | Linkage      |  | No linkage |  |
| Missingness                     |                    |          | 10% missing data |        |            |        | 0% missing data |       |            |       |              |  |            |  |
|                                 | No. of individuals | Raw SNPs |                  |        |            |        |                 |       |            |       |              |  |            |  |
| <i>Maxomys whiteheadi</i>       | Total: 39          |          | 96,264           | 44,909 | 66,469     | 30,638 | 726             | 108   | 272        | 91    |              |  |            |  |
|                                 | Kenyir: 16         | 824,286  |                  |        |            |        |                 |       |            |       |              |  |            |  |
|                                 | Sungai             |          |                  |        |            |        |                 |       |            |       |              |  |            |  |
|                                 | Yu: 23             |          |                  |        |            |        |                 |       |            |       |              |  |            |  |
| <i>Maxomys rajah</i>            | Total: 32          |          | 8,057            | 4,427  | 4,297      | 1,728  | 1,532           | 740   | 849        | 275   |              |  |            |  |
|                                 | Kenyir: 7          | 945,781  |                  |        |            |        |                 |       |            |       |              |  |            |  |
|                                 | Sungai             |          |                  |        |            |        |                 |       |            |       |              |  |            |  |
|                                 | Yu: 25             |          |                  |        |            |        |                 |       |            |       |              |  |            |  |
| <i>Niviventer cremoriventer</i> | Total: 22          |          | 116,617          | 68,639 | 72,220     | 46,913 | 1,588           | 331   | 659        | 290   |              |  |            |  |
|                                 | Kenyir: 20         | 499,093  |                  |        |            |        |                 |       |            |       |              |  |            |  |
|                                 | Sungai             |          |                  |        |            |        |                 |       |            |       |              |  |            |  |
|                                 | Yu: 2              |          |                  |        |            |        |                 |       |            |       |              |  |            |  |
| <i>Tupaia glis</i>              | Total: 45          |          |                  | 157,39 |            | 103,99 |                 | 74,71 |            | 53,55 |              |  |            |  |
|                                 | Kenyir: 25         | 1,228,9  | 349,608          | 0      | 247,183    | 3      | 184,286         | 1     | 137,455    | 7     |              |  |            |  |
|                                 | Sungai             | 12       |                  |        |            |        |                 |       |            |       |              |  |            |  |
|                                 | Yu: 20             |          |                  |        |            |        |                 |       |            |       |              |  |            |  |
